# Supplementary material
Source: publisher figshare collection journal article supplement (https://acs.figshare.com/ndownloader/files/4072216)
Supplement: Supplementary file 1 [file 4072216]

## SUPPORTING INFORMATION

**Figure S1.** Reaction for the *N*-acetylation of aniline by acetyltransferase to yield *N*-phenylacetamide (acetanilide) (adapted from Wang *et al*, 2005)

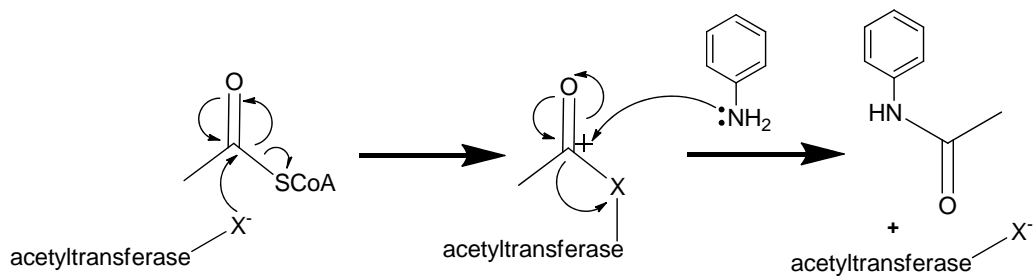

Reference:

Wang, H.; Liu, L.; Hanna, P.E.; Carston, R.W. Catalytic Mechanism of Hamster Arylamine *N*-Acetyltransferase 2. *Biochemistry*. **2005**, *44*, 11295–11306.
